# Supplementary material for: Interventions for assessment and medical care without hospital transfer for older people living with frailty: findings from a formative evaluation
Source: Research Square preprint supplement (doi:10.21203/rs.3.rs-6856675/v1), 2025-07-23
Supplement: Supplementary file 1 [file afe3828bd380ac3662c9c7c7.docx]

**Supplementary file**

1. Supplementary tables

Table S1. Description of the models by TIDieR framework

|  | **EPICENTRE** | **SWFT Model** |
| --- | --- | --- |
| 1 | **Intervention name**  Emergency Point of Care Testing and Treatment in Care Homes and at Home | **Intervention name**  South Warwickshire Integrated Frailty Service |
| 2 | **Rationale**  EPICENTRE is built on the Hospital at Home model of care. The rationale for Hospital at Home includes reducing pressure on hospitals, reducing costs, and reducing risks of hospital-related harms to patients, as hospital admission may be deleterious to health and function, especially among older patients with frailty. | **Rationale**  This approach aligns theoretically with integrated care systems, which essentially combine health and care services (across professionals, facilities, and support systems) so that patients can obtain the support they need in the right place at the right time in line with their needs, values, and preferences. |
| 3 | **Materials used to deliver the intervention**   1. Point-of-care diagnostic equipment (point-of-care blood testing machines, point-of-care ultrasound devices) 2. Medications – via point-of-care drug delivery devices (nebulisers, IV, etc), injectable and oral medications 3. Digital infrastructure The EPICENTRE team use two electronic systems: SystmOne and Unity. SystmOne is a clinical record system used for patient management in the community setting, and captures symptoms, investigations, test results, diagnosis, prescriptions and demographic and social characteristics. Unity on the other hand is a clinical system used in the hospital setting. The EPICENTRE team use SystmOne for recording patient notes electronically, and also have patients’ hospital records on Unity. | **Materials used to deliver the intervention**   1. Two interlinked triage teams: The Integrated Single Point of Access and Integrated Care Co-ordination teams are call centres that receive calls. 2. Computer systems   ‘Consultant Connect’ is an app that enables clinicians and paramedics to connect with consultants for their input into patient care and decision-making around receiving care at home.  Doboco is a web-based clinician computer system used to monitor patients in the care pathway who are living with long-term conditions and/or live in a care home.   1. Community teams: Urgent Community Response team, Virtual ward, Community therapy team, Rapid response team, Community Response team 2. Hospital-based teams: Acute Frailty team 3. Paramedics |
| 4 | **Procedures**  *Triage*  Referrals are taken by the acute medical registrar who determines whether the patient is suitable for EPICENTRE.  Inclusion criteria   - Sandwell / West Birmingham GP - Acute medical needs - Adult (aged 18+ years)   Exclusion criteria   - Acute surgical or trauma needs - Myocardial infarction - Stroke   *Assessment*  Clinical assessment is carried out by an acute medical registrar aided by point-of-care diagnostics such as point-of-care blood tests and point-of-care ultrasound.  *Treatment and follow-up*  Treatment is carried out by the clinical team, usually nursing and advanced clinical practitioner staff, with further visits by the medical registrar if required. Treatments given include IV antibiotics, IV diuretics, Fluids, Nebulisers and injectable and oral medications. Team members usually an advanced clinical practitioner or a nurse will conduct follow up visits until the patient is discharged.  *Discharge*  Patients are discharged to their GP or community teams following the acute care episode | **Procedures**  *Triage*  The integrated Single Point of Access (iSPA) is the first call-point for all referrals. The role of the iSPA call handlers is to pass referrals and calls on to the relevant community teams. The Integrated Care Coordination team receives and triages all referrals relating to acute medical needs or cases requiring input from the acute community health teams over the phone, receiving referrals from the iSPA and health professionals. Patients are directed to supporting teams according to level of clinical need and where an urgent visit (within two hours) is required, this is booked directly into an Urgent Community Response team member’s diary, and that team member is usually notified of the addition. Patients who are not appropriate for UCR input following telephone triage are referred to other appropriate community services.  *Assessment*  Clinical assessment is carried out by the Urgent Community Response team which links to an Acute Frailty Team and a Virtual Ward (acute hospital-at-home service). Patients referred to the acute frailty team may attend the Frailty Assessment Area in the local hospital, if the consultant on the team feels this is necessary.  *Treatment and follow-up*  The Urgent Community Response team delivers care and is supported by the Acute Frailty Team, including providing the in-person care for those in the virtual ward service. The Acute Frailty team is linked to the Same Day Emergency Care unit and 8 inpatient beds in the local hospital.  Other teams that support and provide treatment include the Community Therapy Team, the Rapid Response team and the Community Response Team.  *Discharge*  *Patients are discharged following treatment.* |
| 5 | **Background and expertise of providers**  EPICENTRE is delivered by Acute Medical Registrars, nurses and Advanced Clinical Practitioners, with clinical oversight provided by acute medical consultants.  On a day-to-day basis EPICENTRE is staffed by a medical registrar and a case officer (band 6 nurse or an advanced clinical practitioner)  Hours: Monday to Friday, 09:00 to 17:00. Nurses from the affiliated Urgent Community Response and Virtual Ward teams cover evenings and weekends. | **Background and expertise of providers**  The iSPA is staffed by non-clinical call handlers whilst the Integrated Care Coordination team is staffed by clinically trained staff including band 6 nurses and therapists, who triage and allocate visits. These triage teams then refer patients to the teams below according to clinical need.  *Urgent Community Response team* has 30-40 staff including band 3 to band 6 nurses, band 3 to band 7 therapists and band 7 to band 9 Clinical Practitioners and Advanced Clinical Practitioners. The team operates between 8am-8pm from Mondays to Sundays. The team providing UCR care also provide the in-person care for patients on the *Virtual Ward* with input from the Acute Frailty Team. Patients predicted to need more than 72 hours surveillance are referred to the Virtual Ward.  The *Acute Frailty Team*is staffed with geriatrics consultants and acute Advanced Clinical Practitioners.  The *Community Therapy Team* is staffed by physiotherapists, occupational therapists and therapy assistants.  *Rapid Response* comprises a nurse and a healthcare assistant overnight, and the *Community Response Team* is staffed by clinical support workers and band 5 and 6 nurses. |
| 6. | **Mode of delivery**  Clinical assessment and care are delivered face-to-face | **Mode of delivery**  The Urgent Community Response, Virtual Ward and Community Therapy Team provide in-person care in patients’ homes. The Acute Frailty team provide telephone advice for community-based care and undertakes assessments in the Frailty Assessment Area ward at a local hospital |
| 7. | **Location of delivery**  Care is delivered in the patient's usual place of residence, this may be in their home or a care home | **Location of delivery**  Care is delivered in the patient’s home or the Frailty Assessment Area (Acute Frailty Team only) according to clinical need. |
| 8. | **Number of times delivered over the study period**  The service was delivered to 201 patients over the study period | **Number of times delivered over the study period**  It was not possible to assess the total number going through the SWFT frailty triage system |
| 9. | **Tailoring of the intervention**  Exact assessments and interventions are provided based on individual patient needs, and therefore vary between patients. | **Tailoring of the intervention**  Exact assessments and interventions are provided based on individual patient needs, and therefore vary between patients. |
| 10. | **Modifications**  The intervention was not modified during the study period | **Modifications**  The initial focus of the intervention was providing on-call ambulance staff access to specialist geriatricians (through the iSPA) for input in decision-making regarding whether the patient needed to be conveyed to the hospital or whether it was appropriate for community teams to manage them. The intervention evolved to include the creation of the Integrated Care Coordination team to link patients up to a network of hospital and community teams including Acute Frailty Teams, Virtual Wards and the Urgent Community Response team. |
| 11. | **How well: planned**  It was not possible to assess adherence or fidelity due to the limited routine data available | **How well: planned**  It was not possible to assess adherence or fidelity due to the limited routine data available |
| 12. | **How well: actual**  It was not possible to assess adherence or fidelity due to the limited routine data available | **How well: actual**  It was not possible to assess adherence or fidelity due to the limited routine data available |

Table S2. Cadre of stakeholder interview participants

| **Cadre** | **EPICENTRE**  **(n = 12)** | **SWIFT Frailty Network (n = 21)** |
| --- | --- | --- |
| Doctor | 7 (58%) | 3 (14%) |
| Nurse | 2 (17%) | 3 (14%) |
| Advanced Clinical Practitioner | 3 (25%) | 2 (10%) |
| Manager | 0 (0%) | 6 (29%) |
| Therapist | 0 (0%) | 3 (14%) |
| Paramedic | 0 (0%) | 3 (14%) |
| Unknown | 0 (0%) | 1 (5%) |

1. Data collection instruments
2. **Topic guide for qualitative interviews with professional stakeholders EPICENTRE**

**Getting started**

*Introduction to purpose of discussion.*

*Talk through information sheet and consent form.*

*Ask if any questions or concerns*

Notes

Questions to be used flexibly and selectively according to the situation and role (stakeholders working directly on EPICENTRE, stakeholders referring patients to EPICENTRE, stakeholders involved in operations/management of EPICENTRE)

**Background questions**

Can you tell a bit me about your role in the organisation?

What is your role on EPICENTRE?

*Prompts*

*How long they have been in the role*

*How much of your time is spent working with EPICENTRE?*

*Has your role on EPICENTRE evolved and how?*

*How is your role in EPICENTRE different to your role in your regular care setting?*

*How role relates/links in to the rest of EPICENTRE team*

**Experience of EPICENTRE**

How busy is EPICENTRE, how many patients are you registering in a day?

Can you describe a typical person you would see?

Tell me about the last person you saw.

In your opinion how often do you think you are preventing hospital admission?

What proportion of patients get admitted anyway?

What happens when a patient has an emergency at home with no clinical staff present?

Have you come across a situation where hospital admission was avoided, and a patient deteriorated at home?

*Prompts*

*Tell me about that*

*Explore if / how it affected their confidence in being able to deliver the best patient care*

What is the role of the family / carer of the patient being cared for?

*Prompt*

*Is this significant? Is there a burden in your opinion?*

*Would absence of family / carer be a reason for hospital transfer?*

Have you experienced any barriers to providing care in terms of the set up/ resources in the home?

***Specifically for stakeholders who refer***

Please describe the communication provided to you about the EPICENTRE, and inclusion and exclusion criteria for referrals.

How often do you refer patients to EPICENTRE?

What proportion of the patients you refer get accepted for HaH treatment?

What has been your experience of the process of referral?

Can you describe the typical patient you would refer to EPICENTRE?

*Prompt*

*Do you refer patients that perhaps would not have been admitted to hospital if EPICENTRE was not available?*

How has the availability of EPICENTRE impacted your practice/patient pathways?

Do you take into consideration factors other than clinical indication when making the decision to refer patients?

*(e.g. availability of family/carer, burden to family/carer, availability of resources in the home, living circumstances in the home etc)*

How have patients reacted when you refer them to EPICENTRE?

**Experience of implementation**

What has been your experience on the development of EPICENTRE model / How has the model evolved since you have been involved with it?

Can you tell me about the teams you work with to deliver EPICENTRE?

*Prompt*

*Describe how the teams work together.*

Are you always in agreement that the patients can be safely cared for at home?

What happens when you are not in agreement?

Have you had difficulties travelling to parts of the catchment area?

**Perceptions on operations**

What are your views on the routine functioning of EPICENTRE as a care model?

As a frontline worker what would you say are the strengths and weaknesses of EPICENTRE?

Is EPICENTRE working as intended in your opinion?

What do you think would make it work better?

**Barriers and Facilitators of implementation**

What works well in the day to day running of EPICENTRE and why

What are some of the challenges?

*Prompt*

*Explore impact of contextual factors*

**Final thoughts**

Is there something else you would like to mention, that we haven’t covered?

Thank you for participating.

1. **Topic guide for qualitative interviews with professional stakeholders SWFT**

**Getting started**

*Introduction to purpose of discussion.*

*Talk through information sheet and consent form.*

*Ask if any questions or concerns*

Notes

Questions to be used flexibly and selectively according to the situation and role

**Background questions**

Can you tell a bit me about the team you work in and your role in the organisation?

What is your role on the South Warwickshire Frailty Admission Avoidance in the Community Pathway (SW FAAP)?

*Prompts*

*How long they have been in the role*

*Has your role on SW FAAP evolved and how?*

*How role relates/links into the rest of SW FAAP team*

**Experience of SW FAAP**

***Specifically for integrated Single Point of Access (iSPA) and telephone triage teams***

How busy is SW FAAP, how many patients are you registering in a day?

How many of these are through WMAS?

Can you describe a typical person you would see through WMAS?

How often do you consult the frailty team regarding a WMAS patient?

Can you describe the circumstances under which you would consult the frailty team and the value of this arrangement?

Tell me about the last person you consulted the frailty team on and how it impacted their care pathway.

In your opinion how often do you think you are preventing hospital admission?

Can you describe what care is arranged for those that do not get admitted to hospital?

*Prompt*

*What teams are involved?*

What proportion of patients get admitted anyway after receiving care in the community?

Have you come across a situation where hospital admission was avoided, and a patient deteriorated?

*Prompts*

*Tell me about that*

What is the role of the family / carer of the patient being cared for?

*Prompt*

*Is this significant? Is there a burden in your opinion?*

*Would absence of family / carer be a reason for hospital transfer?*

How does your service interact with the new urgent care response team?

***Specifically for West Midlands Ambulance Service (WMAS)***

Please describe the communication provided to you about the SW-FAAP, and inclusion and exclusion criteria for referrals.

Do you think these criteria work well?

*Prompt*

*Are you able to adhere to them routinely? If not why?*

How often do you consult ISPA regarding frail patients?

Can you describe the typical patient you would refer to iSPA?

What has been your experience of the consulting ISPA regarding a patient?

Can you describe the process to me?

What proportion of patients get treated in the community vs convey to hospital by ambulance transfer following consultation with iSPA?

How has the availability SW FAAP impacted your practice/patient pathways?

Do you take into consideration factors other than clinical indication when making the decision to refer patients?

How have patients reacted when you decide to call iSPA?

Have you experienced patients declining the service and asking for hospital transfer – how do you handle this?

What is the role of the family / carer of the patient being cared for?

*Prompt*

*Is this significant? Is there a burden in your opinion?*

*Would absence of family / carer be a reason for hospital transfer?*

How does your service interact with the new urgent care response team?

***Specifically for Frailty team***

Can you tell me about your experience with SW FAAP?

How does it impact your practice?

In your opinion how do you think it impacts patient experience?

What is the impact on admissions to the frailty unit/ hospital admissions overall?

Can you describe a typical phone consultation through iSPA/WMAS?

Tell me about the last person you consulted the frailty team on and how it impacted their care pathway.

How does your service interact with the new urgent care response team?

What are your views about the acute Hospital at Home model?

**Experience of implementation**

What has been your experience on the development of SW FAAP model / How has the model evolved since you have been involved with it?

Can you tell me about the teams you work with to deliver SW FAAP?

*Prompt*

*Describe how the teams work together.*

Are you always in agreement that the patients can be safely cared for at home?

What happens when you are not in agreement?

What is the role of the family / carer of the patient being cared for?

*Prompt*

*Is this significant? Is there a burden in your opinion?*

*Would absence of family / carer be a reason for hospital transfer?*

What happens when a patient / carer does not want treatment at home – how have you handled this?

**Perceptions on operations – iSPA/WMAS/Frailty team**

What are your views on the routine functioning of SW-FAAP as a care model?

As a frontline worker what would you say are the strengths and weaknesses of SW-FAAP?

Is SW-FAAP working as intended in your opinion?

What do you think would make it work better?

**Barriers and Facilitators of implementation**

What works well in the day to day running of SW-FAAP and why

What are some of the challenges?

*Prompt*

*Explore impact of contextual factors*

**Final thoughts**

Is there something else you would like to mention, that we haven’t covered?

Thank you for participating.
